# Supplementary material for: The mechanism of hydrogen adsorption on transition metal dichalcogenides as hydrogen evolution reaction catalyst
Source: Royal Society of Chemistry journal article supplement (doi:10.1039/c7cp00636e), 2017-01-01
Supplement: c7cp00636e1.pdf [file c7cp00636e1.pdf]

*Supporting Information*

**The Mechanism of Hydrogen Adsorption on Transition Metal Dichalcogenides  
as Hydrogen Evolution Reaction Catalyst**

Jinsong Wang, Jia Liu, Bao Zhang, Xiao Ji, Kui Xu, Chi Chen, Ling Miao\*, Jianjun Jiang\*

*School of Optical and Electronic Information, Huazhong University of Science and Technology,*

*Wuhan 430074, PR China*

\* Corresponding author E-mail: [miaoling@mail.hust.edu.cn](mailto:miaoling@mail.hust.edu.cn); [jiangjj@mail.hust.edu.cn](mailto:jiangjj@mail.hust.edu.cn)

**Table S1.** Calculated values of 2D single-layer MX<sub>2</sub> in the H and T Structures: conduction band minimum, E<sub>cv</sub>; free energy of hydrogen adsorption, ΔG<sub>H</sub>; and conductivity of MX<sub>2</sub> (S and M indicating semiconductor and metallicity separately).

| MX <sub>2</sub>   | phase | Conductivity(S/M) | E <sub>cv</sub> | ΔG <sub>H</sub> (eV) |
|-------------------|-------|-------------------|-----------------|----------------------|
| MoS <sub>2</sub>  | H     | S                 | -4.06           | 1.96                 |
|                   | T     | M                 | -5.03           | 0.12                 |
| ScS <sub>2</sub>  | H     | S                 | -5.46           | -0.12                |
|                   | T     | M                 | -6.78           | -0.81                |
| TiS <sub>2</sub>  | H     | S                 | -6.01           | -0.11                |
|                   | T     | M                 | -5.71           | 0.34                 |
| VS <sub>2</sub>   | H     | M                 | -5.89           | 0.14                 |
|                   | T     | M                 | -5.43           | 0.04                 |
| CrS <sub>2</sub>  | H     | S                 | -4.62           | 1.13                 |
|                   | T     | M                 | -5.11           | -0.17                |
| CoS <sub>2</sub>  | H     | M                 | -5.15           | -0.12                |
|                   | T     | M                 | -5.94           | -0.08                |
| NiS <sub>2</sub>  | H     | M                 | -5.08           | 0.61                 |
|                   | T     | S                 | -5.17           | 0.58                 |
| ZrS <sub>2</sub>  | H     | S                 | -5.76           | 0.04                 |
|                   | T     | S                 | -5.27           | 0.85                 |
| HfS <sub>2</sub>  | H     | S                 | -5.55           | 0.22                 |
|                   | T     | S                 | -5.29           | 1.08                 |
| WS <sub>2</sub>   | H     | S                 | -3.86           | 2.11                 |
|                   | T     | M                 | -4.89           | 0.22                 |
| FeS <sub>2</sub>  | H     | M                 | -5.24           | 0.31                 |
|                   | T     | M                 | -5.39           | 0.27                 |
| NbS <sub>2</sub>  | H     | M                 | -6.09           | 0.09                 |
|                   | T     | M                 | -5.37           | 0.21                 |
| MoSe <sub>2</sub> | H     | S                 | -3.62           | 2.11                 |
|                   | T     | M                 | -4.52           | 0.61                 |
| CoSe <sub>2</sub> | H     | M                 | -5.35           | 0.43                 |
|                   | T     | M                 | -5.47           | 0.49                 |
| ScSe <sub>2</sub> | H     | M                 | -5.81           | 0.26                 |
|                   | T     | M                 | -6.24           | -0.34                |
| HfTe <sub>2</sub> | H     | S                 | -5.13           | 0.76                 |
|                   | T     | M                 | -4.66           | 1.33                 |
| CoTe <sub>2</sub> | H     | M                 | -5.01           | 0.78                 |
|                   | T     | M                 | -4.97           | 0.61                 |
| MoTe <sub>2</sub> | H     | S                 | -3.53           | 2.15                 |
|                   | T     | M                 | -4.15           | 0.93                 |

**Table S2.** Calculated Values of non-metallic elements doped 2H-MoS<sub>2</sub>: The Formation energy,  $E_f$ ; energy of states-filling site,  $E_{cv}$ ; free energy of hydrogen adsorption,  $\Delta G_H$ ;

|                     | $E_{form}$ (eV) |        | $E_{cv}$ | $\Delta G_H$ (eV) |
|---------------------|-----------------|--------|----------|-------------------|
|                     | Mo-rich         | S-rich |          |                   |
| B-MoS <sub>2</sub>  | 2.35            | 4.46   | -5.47    | 0.58              |
| C-MoS <sub>2</sub>  | -0.58           | 1.53   | -4.60    | 1.04              |
| N-MoS <sub>2</sub>  | 0.44            | 2.57   | -5.23    | 0.73              |
| O-MoS <sub>2</sub>  | -2.76           | -0.64  | -4.05    | 1.88              |
| F-MoS <sub>2</sub>  | -1.65           | 0.47   | -4.19    | 1.33              |
| P-MoS <sub>2</sub>  | 0.42            | 2.55   | -5.65    | 0.39              |
| Se-MoS <sub>2</sub> | -1.23           | 0.89   | -4.02    | 1.90              |
| S-vacancy           | 1.08            | 3.03   | -4.58    | 1.31              |
| 2S-vacancies        | 1.12            | 3.18   | -4.72    | 1.27              |
| 3S-vacancies        | 1.22            | 3.28   | -4.86    | 1.21              |
| 4S-vacancies        | 1.26            | 3.32   | -4.97    | 1.10              |

**Figure S1.** Calculated DOS and  $E_{cv}$  for 2H- and 2T-phase  $\text{MoX}_2$  ( $X=\text{S}, \text{Se}, \text{Te}$ ). Watchet and yellow indicate the filled scope of electrons. Red dashed line is set to be  $E_{cv}$ .

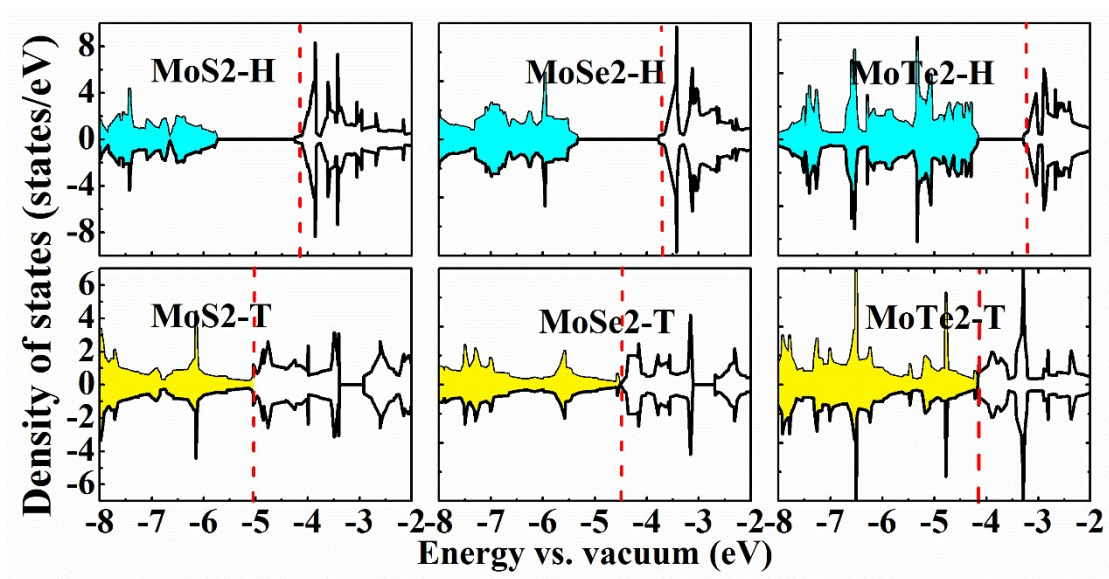

**Figure S2.** Calculated DOS and  $E_{cv}$  for  $2 \times 2$  supercell of 2H- and 2T-phase TMDs. Watchet and yellow indicate the filled scope of electrons. Red dashed line is set to be  $E_{cv}$ .

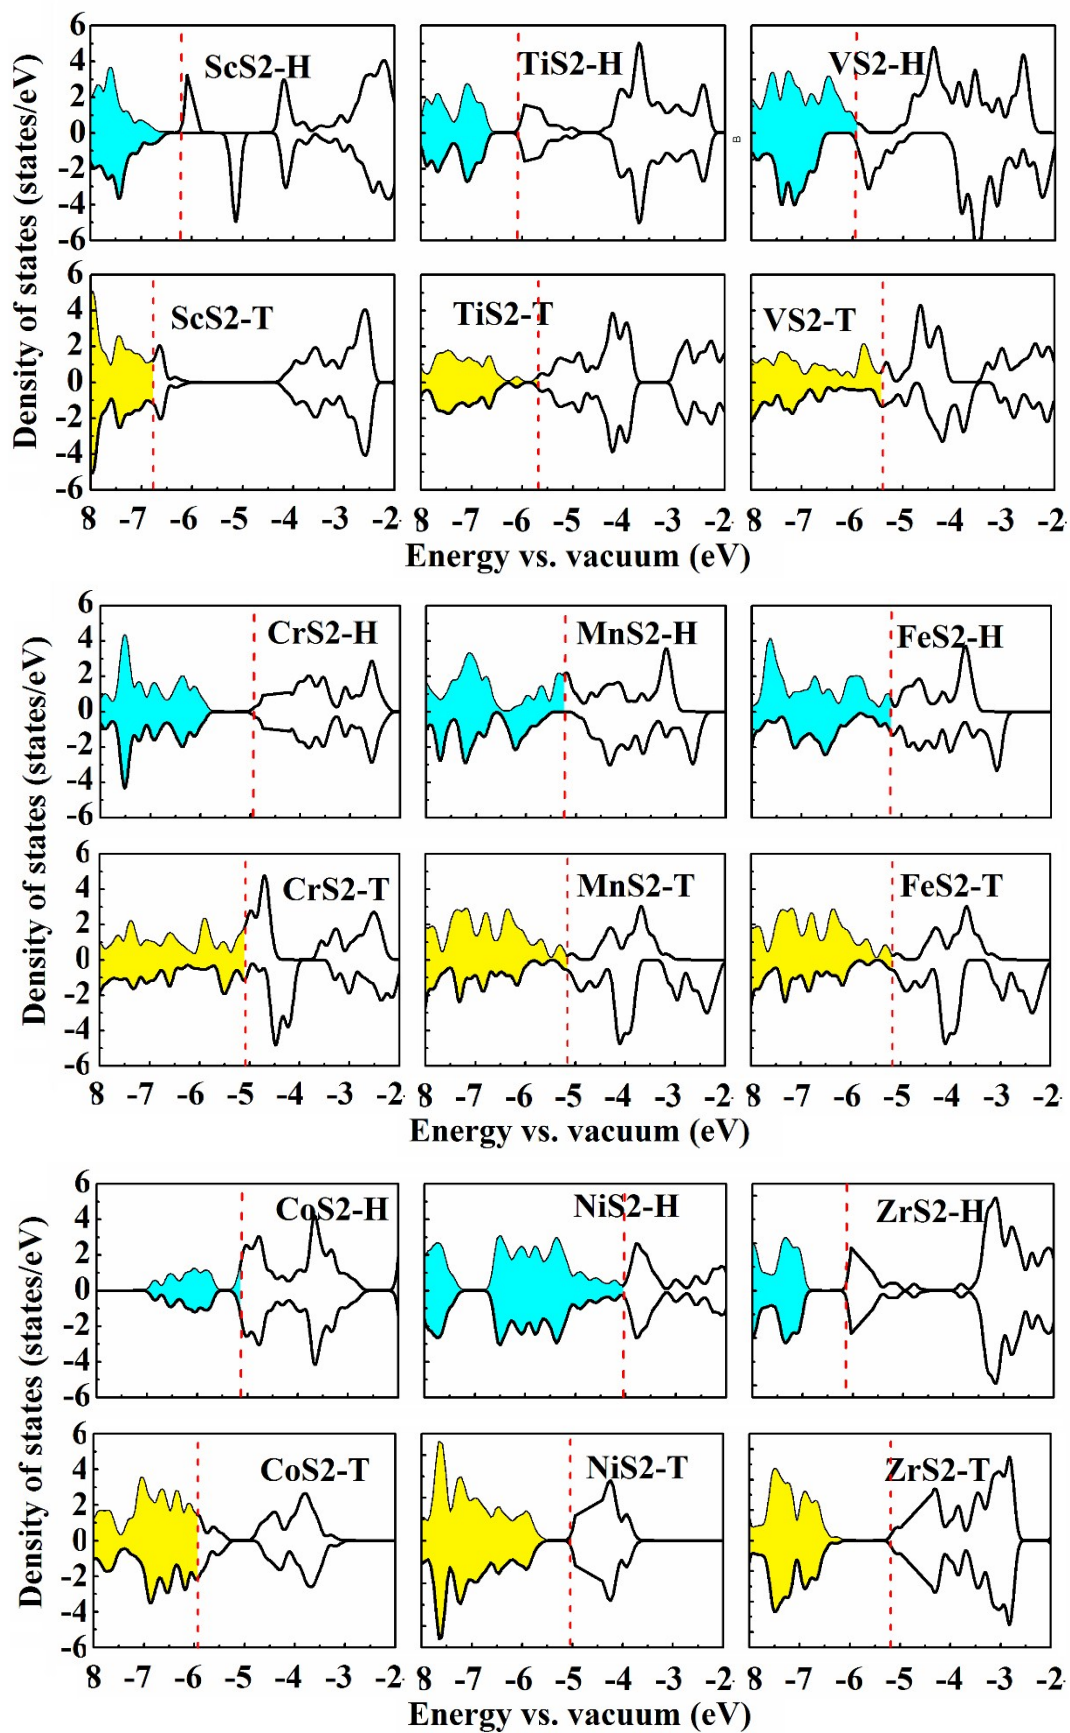

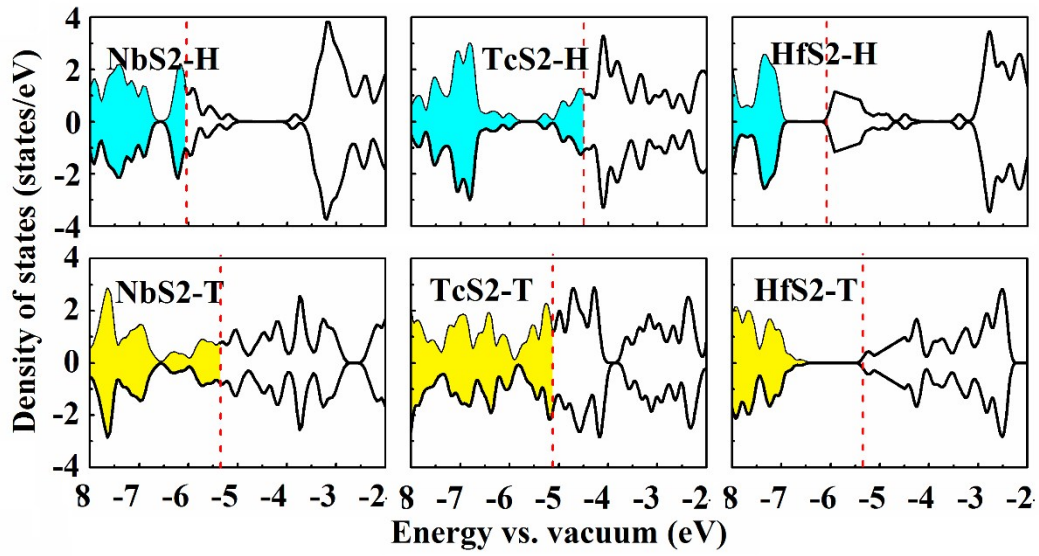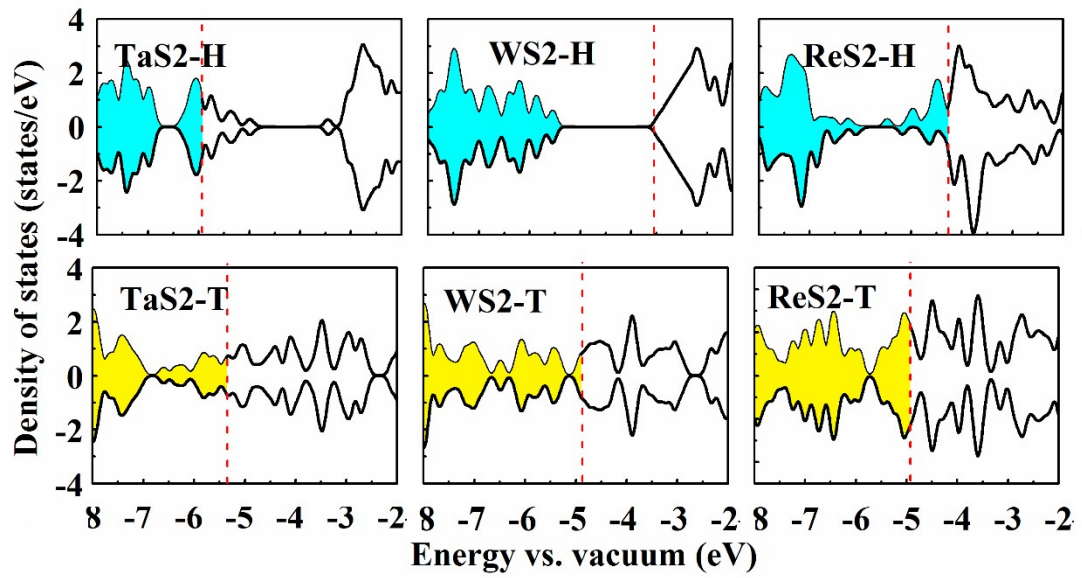

**Figure S3.** Geometric structure of (a) H-phase and (b) T-phase after adsorb H.

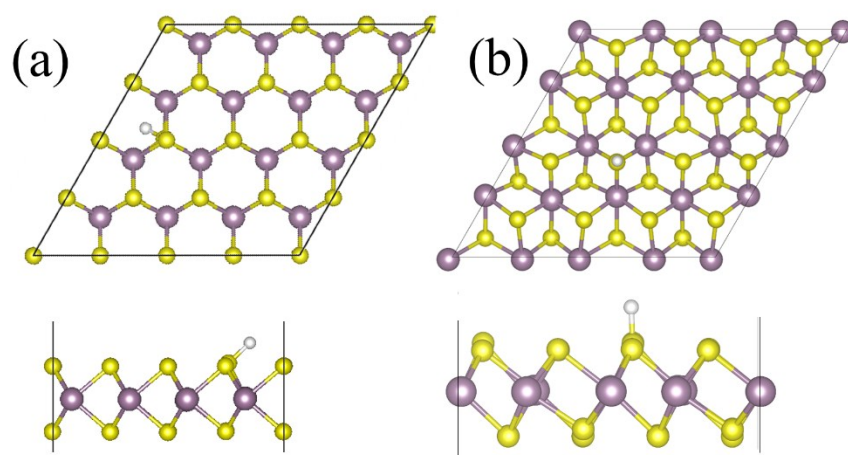

**Figure S4.** The variation of hydrogen chemisorption energy of MX<sub>2</sub> with different Chalcogen.

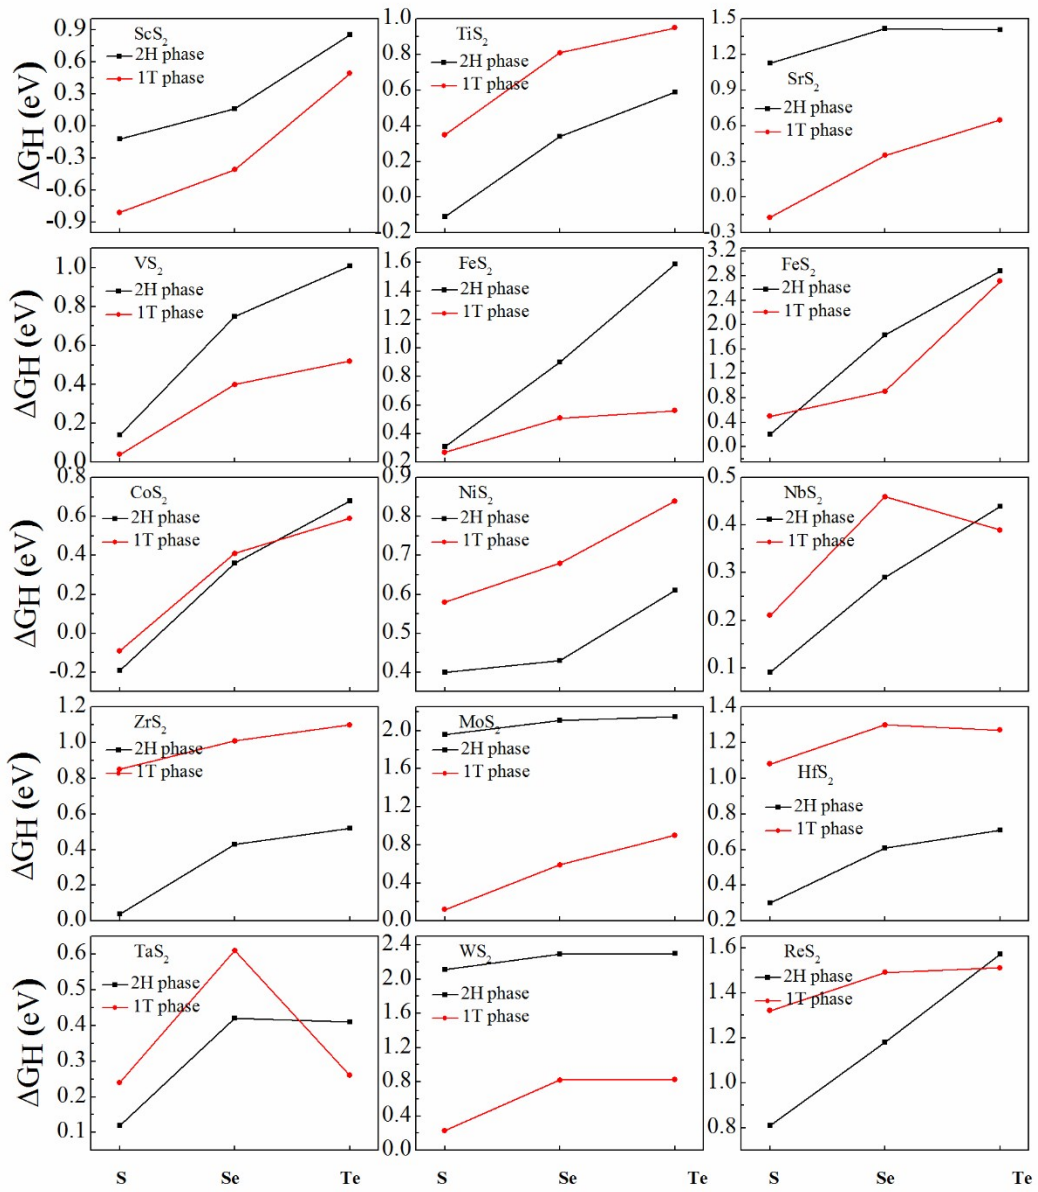



**Figure S5.** The change in hydrogen adsorption free energy  $\Delta G_H$  as a result of coverage for representative 1T-phase  $\text{MoX}_2$  ( $X=\text{S}$ ,  $\text{Se}$  and  $\text{Te}$ ).

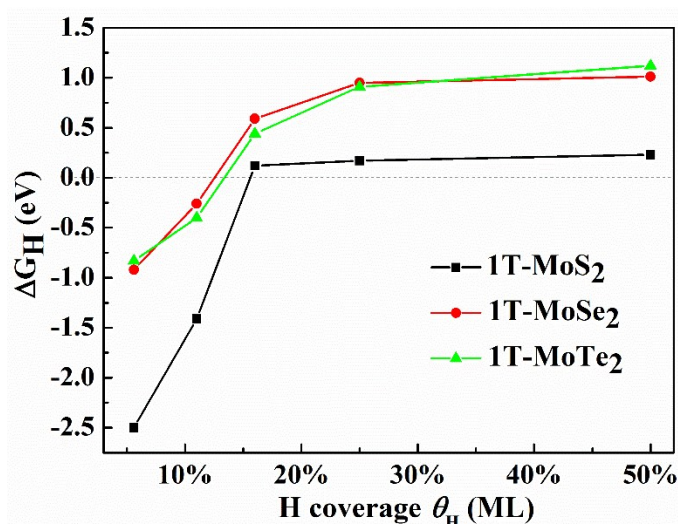

**Hydrogen coverage dependence of  $\Delta G_H$ .** Hydrogen coverage as determinant of  $\Delta G_H$  has been discussed in the present work [1-2]. Take T-phase  $\text{MoS}_2$ ,  $\text{MoSe}_2$  and  $\text{MoTe}_2$  as an example in Figure 4S, generally, the hydrogen binding strengthens incrementally as the hydrogen coverage decreases, it is noticeable that  $\Delta G_H$  possess extraordinary large negative value, it is similar to Tang et al's reports [2]. One important factor is 1T-phase structurally transforms to the 1T' once H is adsorbed when the hydrogen coverage lower than 25% (Figure S3) [3-4]. Moreover, the  $\Delta G_H$  does not decrease solely with the increasing hydrogen coverage due to the different deformation degree in geometry because of the surface reconstitution when hydrogen is adsorbed [4]. Combined with Figure 3, under lower hydrogen coverage, it is most likely that the hydrogen adsorption is closer to equilibrium when filling level approach to SHE.

**Figure S6.** Calculated DOS and  $E_{cv}$  of heteroatom doped 2H-phase MoS<sub>2</sub>. Red line is set to be  $E_{cv}$  black dashed lines indicate standard hydrogen electrode SHE.

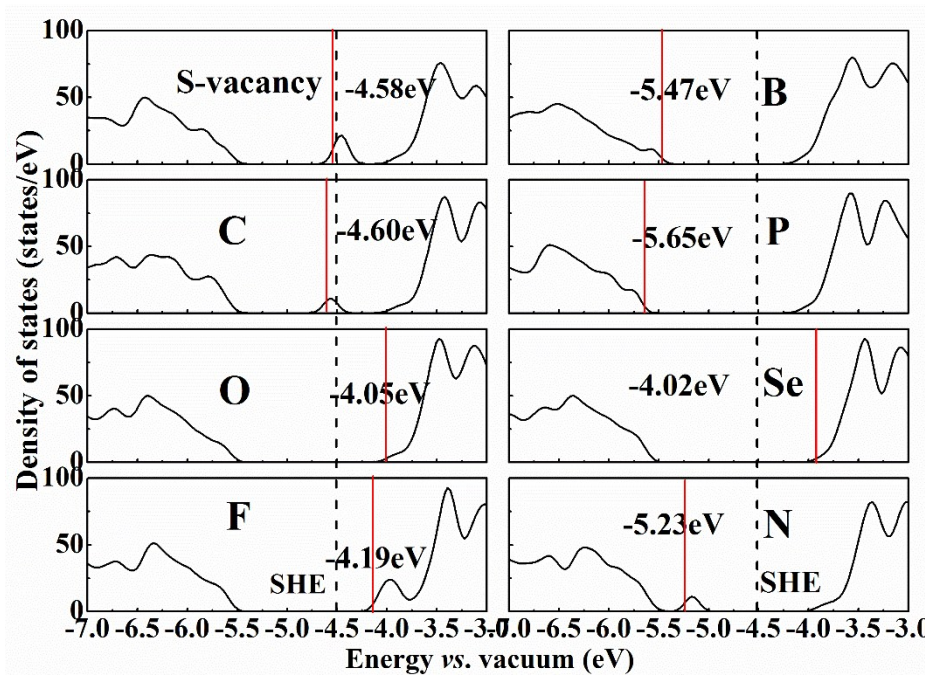

**Figure S7.** PDOS of S without (up) and with (middle) adsorbed H for heteroatom doping. (a) pristine (b) B-doping, (c) C-doping, (d) N-doping, (e) F-doping, (f) S-vacancy. One new peaks near the Fermi level are introduced on S  $p$  orbital due to the inducing of doping, then the peak disappear after S atom absorb H.

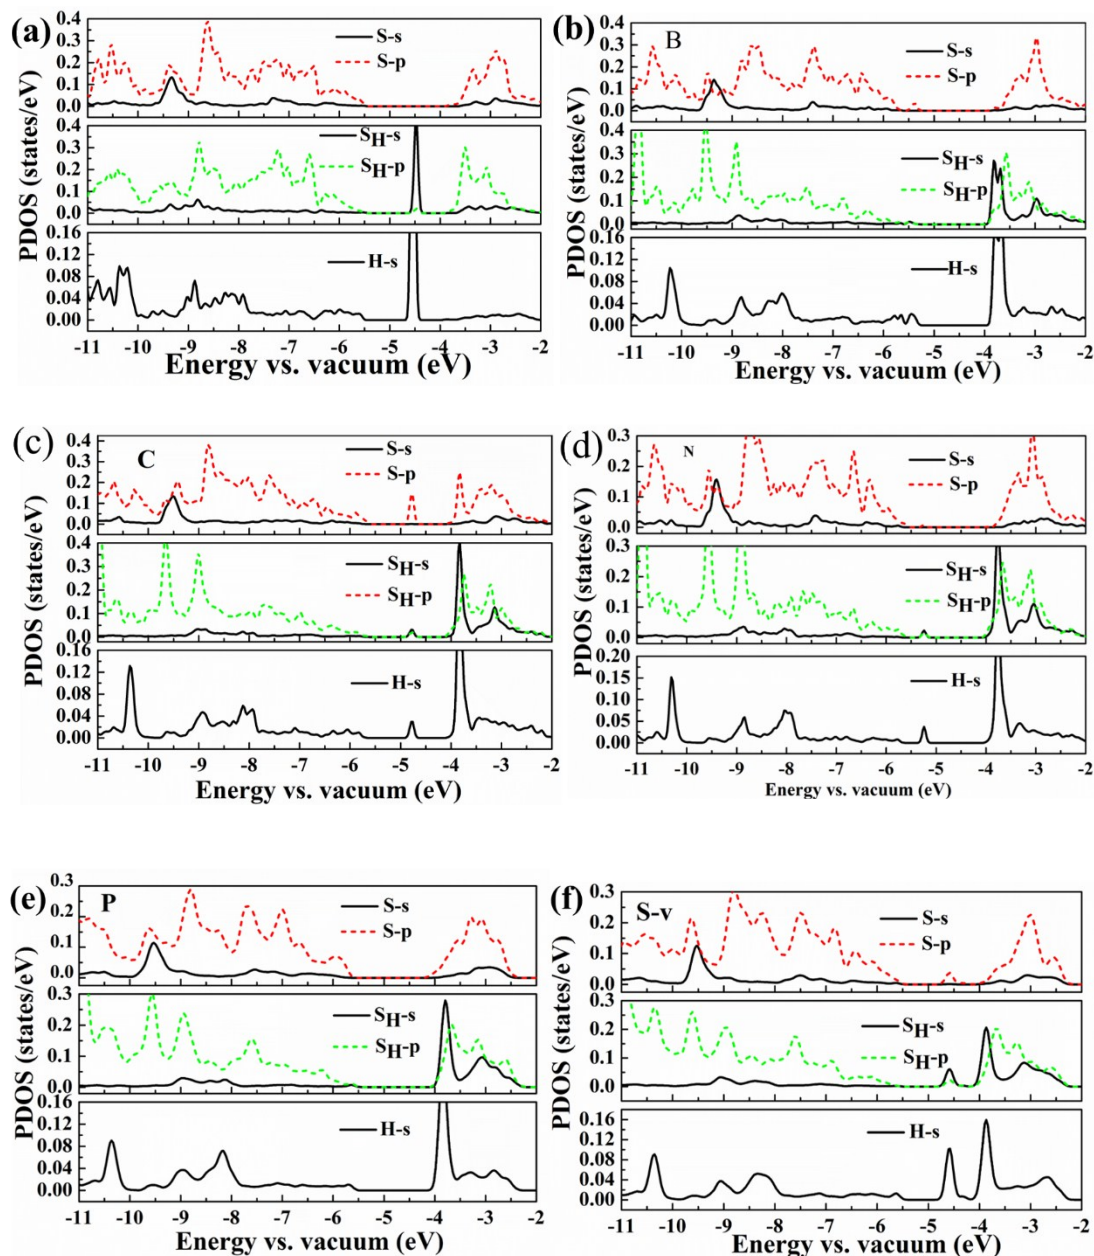

The impurity levels are disparate, for the p-type doping such as B, P and N which the impurities are close to CBM lower than SHE, there show hybridization between S  $p$  and H  $s$  orbits with the different heteroatom substitution for S (Figure S5, S6), suggesting that it more easily to fill the H electron. On the contrary, for n-type doping and pristine MoS<sub>2</sub> which the lowest unoccupied states high than SHE, indicating the unsubstantial covalent bond due to the weaker hybridizing of H  $s$  and S  $p$  orbitals, demonstrating the sluggish kinetics of hydrogen adsorption. In general, the H electron can be accommodated easily as the impurity states located on lower energies level, which explains the gradual strengthening of H binding seen earlier, in good agreement with ‘states-filling’ mode.

**Figure S8.** The Charge density different for heteroatom doping. (a) B-doping, (b) C-doping, (c) N-doping, (d) P-doping. the red and green areas stand for electron gain and loss, respectively.

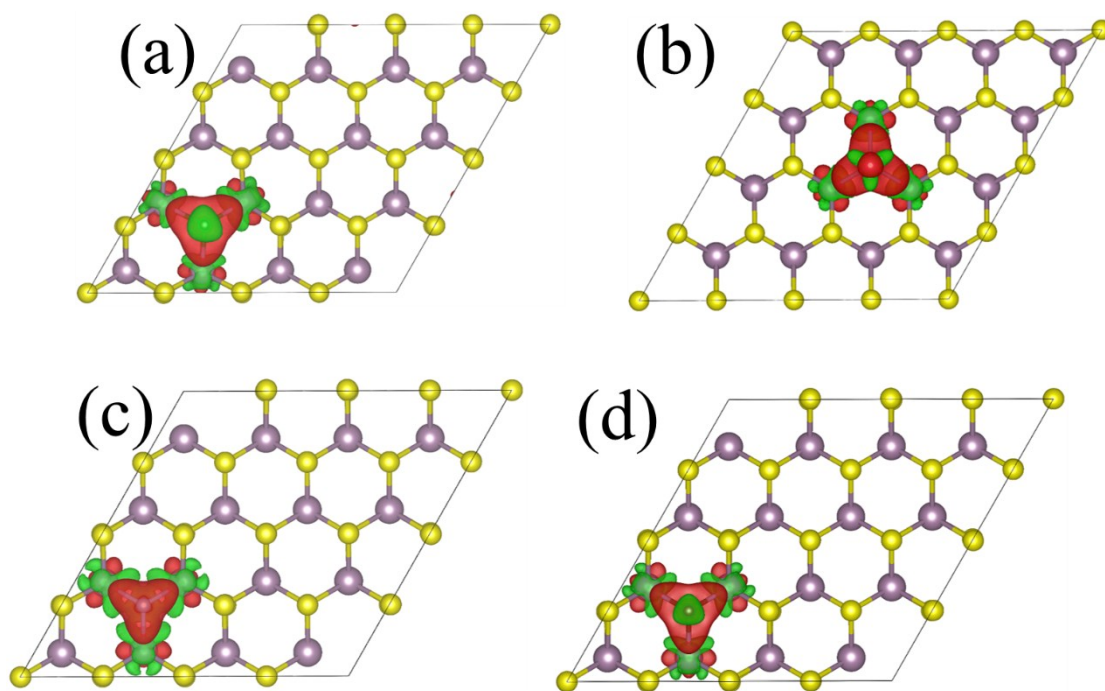

**Figure S9.** Computational electronic band structure of monolayer 2H-phase MoS<sub>2</sub> with different S vacancies.

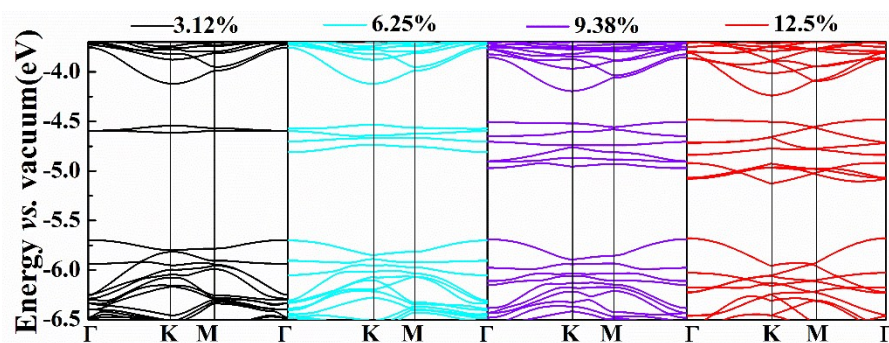

## References

- [1] Tsai, C.; Chan, K.; Nørskov, J. K.; Abild-Pedersen, F., Theoretical Insights into the Hydrogen Evolution Activity of Layered Transition Metal Dichalcogenides. *Surf. Sci.* **2015**, *640*, 133-140.
- [2] Tang, Q.; Jiang, D.-e., Mechanism of Hydrogen Evolution Reaction on 1t-MoS<sub>2</sub> from First Principles. *ACS. Catal.* **2016**, *6*, 4953-4961.
- [3] Tang, Q.; Jiang, D.-e., Stabilization and Band-Gap Tuning of the 1t-MoS<sub>2</sub> monolayer by Covalent Functionalization. *Chem. Mater.* **2015**, *27*, 3743-3748.
- [4] Gao, G.; Jiao, Y.; Ma, F.; Jiao, Y.; Waclawik, E.; Du, A., Charge Mediated Semiconducting-to-Metallic Phase Transition in Molybdenum Disulfide Monolayer and Hydrogen Evolution Reaction in New 1t' Phase. *J. Phys. Chem. C* **2015**, *119*, 13124-13128.
